# Supplementary material
Source: PubMed Central journal article supplement (PMC7948051)
Supplement: NIHMS897565-supplement-Supporting_information.pdf [file NIHMS897565-supplement-Supporting_information.pdf]

1  
2  
3  
4  
5  
6  
7  
8  
9  
10  
11  
12  
13  
14  
15  
16  
17  
18  
19  
20  
21  
22  
23  
24

## Supporting Information

### Urinary Concentrations of Bisphenol A and Three Other Bisphenols in Convenience Samples of U.S. Adults during 2000–2014

Xiaoyun Ye\*, Lee-Yang Wong, Josh Kramer, Xiaoliu Zhou, Tao Jia, and Antonia M. Calafat

Division of Laboratory Sciences, National Center for Environmental Health, Centers for Disease Control and Prevention, Atlanta, Georgia, USA

Corresponding author

Xiaoyun Ye

Centers for Disease Control and Prevention,

4770 Buford Hwy, Mailstop F53,

Atlanta, Georgia 30341, USA

Telephone: 770-488-7502

Fax: 770-488-0333

E-mail: [xay5@cdc.gov](mailto:xay5@cdc.gov)

**Key words:** Biomonitoring, bisphenol A, bisphenol AF, bisphenol F, bisphenol S, exposure

**Pages No.: 5    Table No.: 2**

## 25 Analytical Method for the Quantification of Urinary Concentrations of Bisphenols

26

### 27 1. Preparation of Standard Stock Solutions and Quality Control (QC) Materials

28 We prepared the stock solutions of individual analytical standards and stable isotope-labeled internal  
29 standards in MeOH. Ten stock solutions containing BPA, BPS, BPF, and BPAF were generated by  
30 serial dilution of the individual stocks with MeOH; the final concentrations ranged from 0.01 to 100  
31 ng/mL for all four analytes. The internal standard solution containing the stable isotope-labeled analogs  
32 of BPA, BPS and BPF was prepared so that a 50  $\mu$ L spike would result in a concentration of each  
33 analyte of 25 ng/mL; we used  $^{13}\text{C}_{12}$ -BPA as the internal standard for BPAF. The stock solutions and  
34 internal standard solution containing all four analytes, dispensed into 1.5 mL glass vials and 10 mL glass  
35 vials respectively, were stored at -70  $^{\circ}\text{C}$  until used.

36 QC materials were prepared from blank urine pre-screened to confirm that it did not contain  
37 detectable concentrations of the target analytes. The blank urine was divided into two aliquots to create  
38 QC low (QCL) and QC high (QCH) concentration pools. The QCL and the QCH pools were enriched  
39 with different levels of native target compounds, and all QC materials were stored in 1.5 mL glass vials  
40 at -70  $^{\circ}\text{C}$  until used.

41

### 42 2. Limits of Detection (LODs)

43 Pre-screened blank urines spiked with the three lowest standards (0.01  $\mu\text{g/L}$ , 0.1  $\mu\text{g/L}$ , 1.0  $\mu\text{g/L}$ )  
44 and isotope-labeled internal standard solutions were analyzed repeatedly to determine the LODs.  
45 LODs were calculated as  $3S_0$ , where  $S_0$  is the standard deviation as the concentration approaches zero  
46 (*1*). The calculated LODs were 0.1  $\mu\text{g/L}$  for all four bisphenols.

47

### 48 3. Method Validation

49 We obtained calibration curves after spiking water or blank urine with the analytical standards.  
50 The slopes of the calibration curves in H<sub>2</sub>O or urine were quite similar (i.e., percentage of the difference  
51 <3%, calculated from the mean slope of three sets of standards prepared in H<sub>2</sub>O and in urine),  
52 suggesting that the accuracy of the method was not compromised by the matrix. We used H<sub>2</sub>O-based  
53 curves for quantification. The calibration curves included ten standard points with concentrations  
54 ranging from 0.01 µg/L to 100 µg/L; constructed using 1/x weighing linear regression, the calibration  
55 curves showed adequate linearity with correlation coefficients >0.99 for all four analytes.

56 The method accuracy was assessed by analyses of blank urine spiked at four spiking levels (0.5,  
57 1.0, 5.0, 10.0 µg/L), and expressed as the percentage of the recovery. The method accuracy of the four  
58 analytes varied from 91 % to 107 % (Supporting Information Table 1). We determined the method  
59 precision from 20 repeated measurements of the two QC materials over one month. The relative  
60 standard deviations (RSDs) which reflect the intra- and inter-day variability of the method ranged from  
61 5.0 % to 11 % for all four analytes (Supporting Information Table 2).

62  
63  
64  
65  
66  
67  
68  
69  
70  
71  
72  
73  
74  
75  
76  
77  
78

### Reference List

[1] Taylor, J.K. 1987. Quality Assurance of Chemical Measurements. Chelsea, MI:Lewis Publishers

79 Supporting Information Table 1. Accuracy obtained from the spike recovery (%) of select analytical  
80 standards. The number in parenthesis is the spiking standard concentration (in  $\mu\text{g/L}$ ).

81

82

83

| Analyte | Spike Recovery (%) |       |       |        |
|---------|--------------------|-------|-------|--------|
|         | (0.5)              | (1.0) | (5.0) | (10.0) |
| BPA     | 106                | 104   | 102   | 99     |
| BPS     | 107                | 106   | 94    | 104    |
| BPF     | 104                | 95    | 91    | 102    |
| BPAF    | 104                | 91    | 107   | 99     |

94

95

96

97

98

99

100

101

102

103

104

105

106

107

108

109

110

111

112

113

114

115

116

117

118

119

120 Supporting Information Table 2. Precision obtained from 20 repeated measurements of two QC  
121 materials (QC low and QC High) over one month.

122

123

124

125

126

127

128

| <b>Analyte</b> | <b>QC High</b>                               |            | <b>QC Low</b>                                |            |
|----------------|----------------------------------------------|------------|----------------------------------------------|------------|
|                | Mean<br>Concentration<br>( $\mu\text{g/L}$ ) | RSD<br>(%) | Mean<br>Concentration<br>( $\mu\text{g/L}$ ) | RSD<br>(%) |
| BPA            | 9.9                                          | 5.0        | 2.1                                          | 5.4        |
| BPS            | 4.9                                          | 6.4        | 0.50                                         | 6.1        |
| BPF            | 5.0                                          | 6.7        | 0.50                                         | 9.6        |
| BPAF           | 4.8                                          | 8.5        | 0.49                                         | 11         |
